# Supplementary material for: Early Prediction for Prediabetes and Type 2 Diabetes Using the Genetic Risk Score and Oxidative Stress Score
Source: MDPI journal article supplement (doi:10.3390/antiox11061196), 2022-06-17
Supplement: s1 [file s1]

**Table S1.** Odds ratios for risk factors for the incidence of prediabetes and T2DM in a Korean population.

|         | OR (95% CI)         | <i>p</i> Value           |
|---------|---------------------|--------------------------|
| Model 1 |                     |                          |
| BMI     | 1.112 (1.074–1.151) | $2.2823 \times 10^{-9}$  |
| AUROC   | 0.590 (0.561–0.619) | $5.8534 \times 10^{-9}$  |
| Model 2 |                     |                          |
| OSS     | 2.875 (2.389–3.460) | $4.9763 \times 10^{-29}$ |
| AUROC   | 0.680 (0.652–0.709) | $1.5722 \times 10^{-31}$ |
| Model 3 |                     |                          |
| GRS     | 1.722 (1.386–2.141) | $9.5294 \times 10^{-7}$  |
| AUROC   | 0.578 (0.549–0.608) | $3.7834 \times 10^{-7}$  |
| Model 4 |                     |                          |
| BMI     | 1.087 (1.048–1.127) | 0.000009                 |
| OSS     | 2.740 (2.272–3.304) | $4.793 \times 10^{-26}$  |
| AUROC   | 0.691 (0.663–0.718) | $4.3889 \times 10^{-35}$ |
| Model 5 |                     |                          |
| OSS     | 2.942 (2.435–3.554) | $5.1412 \times 10^{-29}$ |
| GRS     | 1.724 (1.376–2.161) | 0.000002                 |
| AUROC   | 0.693 (0.666–0.721) | $5.729 \times 10^{-36}$  |
| Model 6 |                     |                          |
| BMI     | 1.088 (1.048–1.130) | 0.000010                 |
| OSS     | 2.808 (2.319–3.400) | $3.9192 \times 10^{-26}$ |
| GRS     | 1.777 (1.415–2.231) | $7.4856 \times 10^{-7}$  |
| AUROC   | 0.705 (0.678–0.733) | $2.6415 \times 10^{-40}$ |

ORs with 95% CIs and *p* values were derived from logistic regression. CI, confidence interval; AUROC, area under the ROC curve.

Range of BMI (kg/m<sup>2</sup>): low, <24.197; high, ≥24.197

Range of OSS: low, <1.322; high, ≥1.322

Range of GRS: low, <1.556; high, ≥1.556
